# Supplementary material for: Catalase T-Deficient Fission Yeast Meiocytes Show Resistance to Ionizing Radiation
Source: MDPI journal article supplement (doi:10.3390/antiox9090881), 2020-09-17
Supplement: s1 [file s1]

## Suppl. Fig. S1

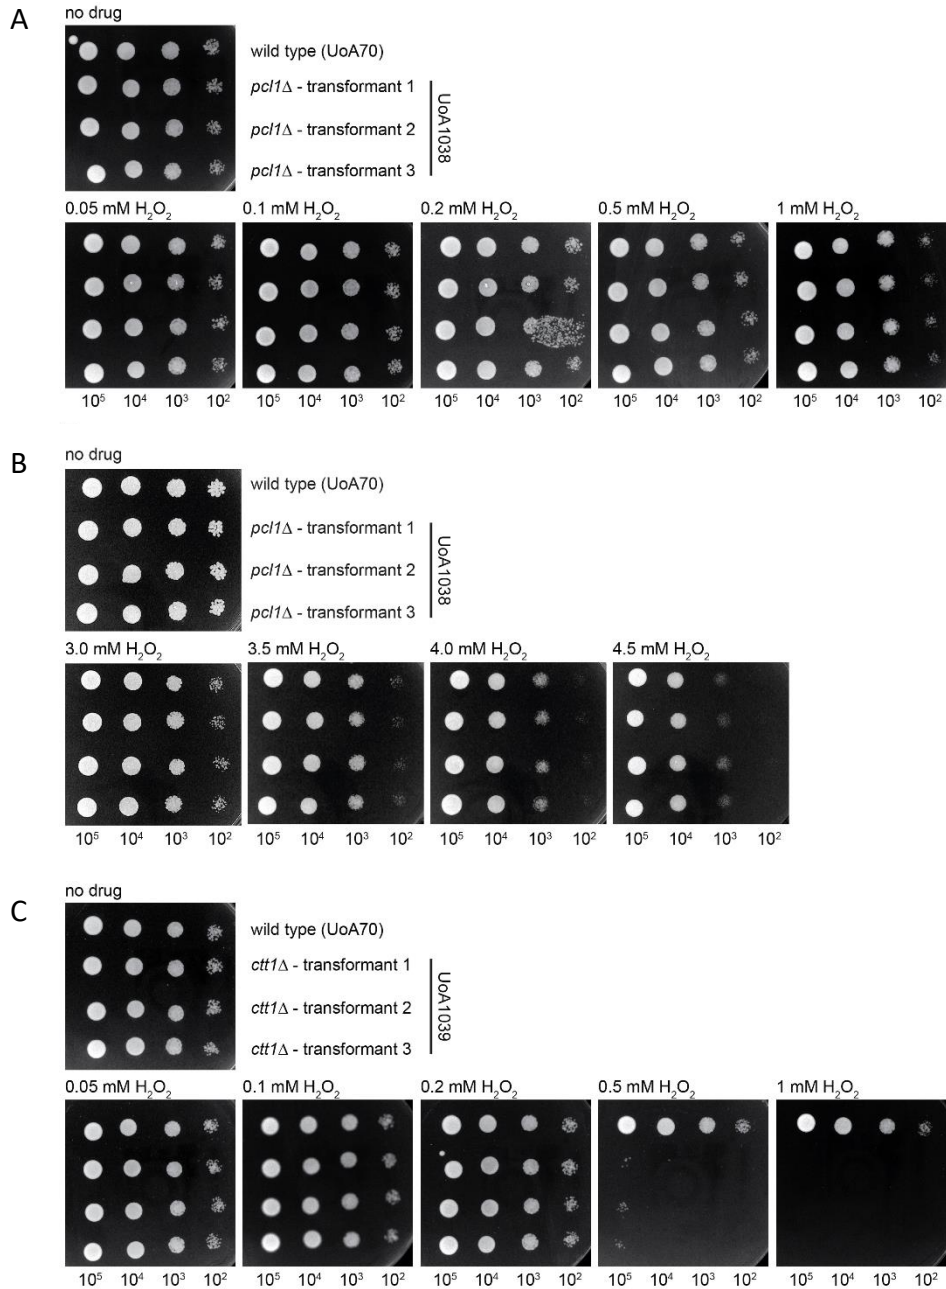

**Supplementary Figure S1: Spot assays** of wild-type (UoA70), *pcl1* $\Delta$  (UoA1038), and *ctt1* $\Delta$  (UoA1039) mutant strains on solid growth media containing the indicated concentration of H<sub>2</sub>O<sub>2</sub>.
